# Supplementary material for: Blood Plasma Small Non-Coding RNAs as Diagnostic Molecules for the Progesterone-Receptor-Negative Phenotype of Serous Ovarian Tumors
Source: MDPI journal article supplement (doi:10.3390/ijms241512214), 2023-07-30
Supplement: s1 [file s1]

Table S1: miRNA deep sequencing data for serous ovarian tumors.

Table S2: piRNA deep sequencing data for serous ovarian tumors.

Table S3: Spearman's nonparametric correlation test data.

Table S4: functional analysis of gene-targets for piRNAs and miRNAs from Figure 7 and Figure 8.

Table S5: parameters of PCR primers used to analyze miRNA, piRNA and mRNA.
